# Supplementary material for: Identification of miRNA-mRNA associations in hepatocellular carcinoma using hierarchical integrative model
Source: PubMed Central journal article supplement (PMC7106691; doi:10.1186/s12920-020-0706-1), 2020-03-30
Supplement: 12920_2020_706_MOESM1_ESM.pdf [file 12920_2020_706_MOESM1_ESM.pdf]

| miRNA - mRNA pair |   |   | miRNA - mRNA pair |                 |   | miRNA - mRNA pair |          |                   | miRNA - mRNA pair |   |         |                  |   |   |         |
|-------------------|---|---|-------------------|-----------------|---|-------------------|----------|-------------------|-------------------|---|---------|------------------|---|---|---------|
| hsa-miR-130a-3p   | ↓ | ↑ | AKR1B10           | hsa-miR-1285-3p | ↑ | ↑                 | CD34     | hsa-miR-182-5p    | ↑                 | ↑ | VPS45   | hsa-miR-34c-5p   | ↑ | ↓ | CHRD    |
| hsa-miR-4686      | ↓ | ↑ | CAP2              | hsa-miR-221-3p  | ↑ | ↑                 | CD34     | hsa-miR-190b      | ↑                 | ↑ | VPS45   | hsa-miR-589-5p   | ↑ | ↓ | CHRD    |
| hsa-miR-187-3p    | ↓ | ↑ | CD34              | hsa-miR-3144-3p | ↑ | ↑                 | CD34     | hsa-miR-21-5p     | ↑                 | ↑ | VPS45   | hsa-miR-671-3p   | ↑ | ↓ | CHRD    |
| hsa-miR-4686      | ↓ | ↑ | CD34              | hsa-miR-671-5p  | ↑ | ↑                 | CD34     | hsa-miR-3144-3p   | ↑                 | ↑ | VPS45   | hsa-miR-15b-3p   | ↑ | ↓ | CYP2B7P |
| hsa-miR-675-3p    | ↓ | ↑ | CD34              | hsa-miR-10b-5p  | ↑ | ↑                 | EBF2     | hsa-miR-324-5p    | ↑                 | ↑ | VPS45   | hsa-miR-183-5p   | ↑ | ↓ | CYP2B7P |
| hsa-miR-1231      | ↓ | ↑ | EBF2              | hsa-miR-1285-3p | ↑ | ↑                 | EBF2     | hsa-miR-34c-3p    | ↑                 | ↑ | VPS45   | hsa-miR-196b-5p  | ↑ | ↓ | CYP2B7P |
| hsa-miR-136-3p    | ↓ | ↑ | EBF2              | hsa-miR-532-3p  | ↑ | ↑                 | EBF2     | hsa-miR-452-5p    | ↑                 | ↑ | VPS45   | hsa-miR-301a-5p  | ↑ | ↓ | CYP2B7P |
| hsa-miR-139-3p    | ↓ | ↑ | EBF2              | hsa-miR-589-5p  | ↑ | ↑                 | EBF2     | hsa-miR-454-3p    | ↑                 | ↑ | VPS45   | hsa-miR-532-3p   | ↑ | ↓ | CYP2B7P |
| hsa-miR-4686      | ↓ | ↑ | EBF2              | hsa-miR-671-5p  | ↑ | ↑                 | EBF2     | hsa-miR-5010-3p   | ↑                 | ↑ | VPS45   | hsa-miR-589-5p   | ↑ | ↓ | CYP2B7P |
| hsa-miR-511-5p    | ↓ | ↑ | EBF2              | hsa-miR-15b-3p  | ↑ | ↑                 | FLAD1    | hsa-miR-93-5p     | ↑                 | ↑ | VPS45   | hsa-miR-106b-5p  | ↑ | ↓ | IFITM10 |
| hsa-miR-597-5p    | ↓ | ↑ | EBF2              | hsa-miR-589-5p  | ↑ | ↑                 | FLAD1    | hsa-miR-95-5p     | ↑                 | ↑ | VPS45   | hsa-miR-532-3p   | ↑ | ↓ | IFITM10 |
| hsa-miR-4686      | ↓ | ↑ | FBXL18            | hsa-miR-1180-3p | ↑ | ↑                 | GNS      | hsa-miR-96-5p     | ↑                 | ↑ | VPS45   | hsa-miR-10b-5p   | ↑ | ↓ | MARCO   |
| hsa-miR-139-3p    | ↓ | ↑ | FLAD1             | hsa-miR-34a-5p  | ↑ | ↑                 | GNS      | hsa-miR-139-3p    | ↓                 | ↓ | CHRD    | hsa-miR-130b-5p  | ↑ | ↓ | MARCO   |
| hsa-miR-19a-5p    | ↓ | ↑ | FLAD1             | hsa-miR-34b-5p  | ↑ | ↑                 | GNS      | hsa-miR-4686      | ↓                 | ↓ | CHRD    | hsa-miR-151a-3p  | ↑ | ↓ | MARCO   |
| hsa-miR-383-5p    | ↓ | ↑ | FLAD1             | hsa-miR-34c-3p  | ↑ | ↑                 | GNS      | hsa-miR-548aq-3p  | ↓                 | ↓ | CHRD    | hsa-miR-221-3p   | ↑ | ↓ | MARCO   |
| hsa-miR-424-5p    | ↓ | ↑ | FLAD1             | hsa-miR-4454    | ↑ | ↑                 | GNS      | hsa-miR-122-3p    | ↓                 | ↓ | CYP2B7P | hsa-miR-3662     | ↑ | ↓ | MARCO   |
| hsa-miR-675-3p    | ↓ | ↑ | FLAD1             | hsa-miR-548l    | ↑ | ↑                 | GNS      | hsa-miR-203a-3p   | ↓                 | ↓ | CYP2B7P | hsa-miR-3684     | ↑ | ↓ | MARCO   |
| hsa-miR-1208      | ↓ | ↑ | GNS               | hsa-miR-671-3p  | ↑ | ↑                 | GNS      | hsa-miR-378c      | ↓                 | ↓ | CYP2B7P | hsa-miR-454-3p   | ↑ | ↓ | MARCO   |
| hsa-miR-19a-5p    | ↓ | ↑ | GNS               | hsa-miR-7-5p    | ↑ | ↑                 | GNS      | hsa-miR-4686      | ↓                 | ↓ | CYP2B7P | hsa-miR-4659a-3p | ↑ | ↓ | MARCO   |
| hsa-miR-200b-3p   | ↓ | ↑ | GNS               | hsa-miR-221-3p  | ↑ | ↑                 | LARS     | hsa-miR-378d      | ↓                 | ↓ | IFITM10 | hsa-miR-532-3p   | ↑ | ↓ | MARCO   |
| hsa-miR-130a-3p   | ↓ | ↑ | LARS              | hsa-miR-339-3p  | ↑ | ↑                 | LARS     | hsa-miR-424-5p    | ↓                 | ↓ | IFITM10 | hsa-miR-589-3p   | ↑ | ↓ | MARCO   |
| hsa-miR-4686      | ↓ | ↑ | MGC27345          | hsa-miR-34c-3p  | ↑ | ↑                 | LARS     | hsa-miR-101-5p    | ↓                 | ↓ | MARCO   | hsa-miR-887-5p   | ↑ | ↓ | MARCO   |
| hsa-miR-19a-5p    | ↓ | ↑ | SLC25A40          | hsa-miR-190b    | ↑ | ↑                 | SLC25A40 | hsa-miR-125b-2-3p | ↓                 | ↓ | MARCO   | hsa-miR-942-5p   | ↑ | ↓ | MARCO   |
| hsa-miR-1208      | ↓ | ↑ | TERT              | hsa-miR-3144-3p | ↑ | ↑                 | SLC25A40 | hsa-miR-146a-5p   | ↓                 | ↓ | MARCO   | hsa-miR-34a-3p   | ↑ | ↓ | MT1JP   |
| hsa-miR-19a-5p    | ↓ | ↑ | TERT              | hsa-miR-339-3p  | ↑ | ↑                 | SLC25A40 | hsa-miR-200a-3p   | ↓                 | ↓ | MARCO   | hsa-miR-34b-3p   | ↑ | ↓ | MT1JP   |
| hsa-miR-383-5p    | ↓ | ↑ | TERT              | hsa-miR-34c-3p  | ↑ | ↑                 | SLC25A40 | hsa-miR-219b-5p   | ↓                 | ↓ | MARCO   | hsa-miR-34c-3p   | ↑ | ↓ | MT1JP   |
| hsa-miR-488-3p    | ↓ | ↑ | TERT              | hsa-miR-4742-3p | ↑ | ↑                 | SLC25A40 | hsa-miR-378d      | ↓                 | ↓ | MARCO   | hsa-miR-3684     | ↑ | ↓ | MT1JP   |
| hsa-miR-6503-3p   | ↓ | ↑ | TERT              | hsa-miR-5010-3p | ↑ | ↑                 | SLC25A40 | hsa-miR-6503-3p   | ↓                 | ↓ | MARCO   | hsa-miR-423-3p   | ↑ | ↓ | MT1JP   |
| hsa-miR-6719-3p   | ↓ | ↑ | TERT              | hsa-miR-1306-5p | ↑ | ↑                 | TERT     | hsa-miR-8077      | ↓                 | ↓ | MARCO   | hsa-miR-423-5p   | ↑ | ↓ | MT1JP   |
| hsa-miR-675-3p    | ↓ | ↑ | TERT              | hsa-miR-130b-5p | ↑ | ↑                 | TERT     | hsa-miR-122-5p    | ↓                 | ↓ | MT1JP   | hsa-miR-4791     | ↑ | ↓ | MT1JP   |
| hsa-miR-8077      | ↓ | ↑ | TERT              | hsa-miR-15b-3p  | ↑ | ↑                 | TERT     | hsa-miR-1231      | ↓                 | ↓ | MT1JP   | hsa-miR-95-5p    | ↑ | ↓ | MT1JP   |
| hsa-miR-4686      | ↓ | ↑ | TRMT6             | hsa-miR-190b    | ↑ | ↑                 | TERT     | hsa-miR-136-3p    | ↓                 | ↓ | MT1JP   | hsa-miR-2277-5p  | ↑ | ↓ | SLFNL1  |
| hsa-miR-146b-3p   | ↓ | ↑ | VPS45             | hsa-miR-197-3p  | ↑ | ↑                 | TERT     | hsa-miR-139-5p    | ↓                 | ↓ | MT1JP   | hsa-miR-4742-3p  | ↑ | ↓ | SLFNL1  |
| hsa-miR-4472      | ↓ | ↑ | VPS45             | hsa-miR-21-5p   | ↑ | ↑                 | TERT     | hsa-miR-146b-3p   | ↓                 | ↓ | MT1JP   | hsa-miR-671-3p   | ↑ | ↓ | SLFNL1  |
| hsa-miR-4721      | ↓ | ↑ | VPS45             | hsa-miR-3144-3p | ↑ | ↑                 | TERT     | hsa-miR-4484      | ↓                 | ↓ | MT1JP   |                  |   |   |         |
| hsa-miR-675-3p    | ↓ | ↑ | VPS45             | hsa-miR-3613-5p | ↑ | ↑                 | TERT     | hsa-miR-548aq-3p  | ↓                 | ↓ | MT1JP   |                  |   |   |         |
| hsa-miR-7704      | ↓ | ↑ | VPS45             | hsa-miR-548l    | ↑ | ↑                 | TERT     | hsa-miR-6503-3p   | ↓                 | ↓ | MT1JP   |                  |   |   |         |
| hsa-miR-130b-3p   | ↑ | ↑ | AKR1B10           | hsa-miR-570-3p  | ↑ | ↑                 | TERT     | hsa-miR-6719-3p   | ↓                 | ↓ | MT1JP   |                  |   |   |         |
| hsa-miR-188-5p    | ↑ | ↑ | AKR1B10           | hsa-miR-887-5p  | ↑ | ↑                 | TERT     | hsa-miR-130a-3p   | ↓                 | ↓ | SLFNL1  |                  |   |   |         |
| hsa-miR-221-3p    | ↑ | ↑ | AKR1B10           | hsa-miR-106b-5p | ↑ | ↑                 | VPS45    | hsa-miR-30e-5p    | ↓                 | ↓ | SLFNL1  |                  |   |   |         |
| hsa-miR-10b-5p    | ↑ | ↑ | CD34              | hsa-miR-15b-5p  | ↑ | ↑                 | VPS45    | hsa-miR-339-3p    | ↑                 | ↓ | CHRD    |                  |   |   |         |

Up-regulation ↑  
Down-regulation ↓
