# Supplementary material for: Identification of miRNA-mRNA associations in hepatocellular carcinoma using hierarchical integrative model
Source: PubMed Central journal article supplement (PMC7106691; doi:10.1186/s12920-020-0706-1), 2020-03-30
Supplement: 12920_2020_706_MOESM3_ESM.pdf [file 12920_2020_706_MOESM3_ESM.pdf]

| miRNA - mRNA pair |   |         | miRNA - mRNA pair |   |         | miRNA - mRNA pair |   |          | miRNA - mRNA pair |   |          |
|-------------------|---|---------|-------------------|---|---------|-------------------|---|----------|-------------------|---|----------|
| hsa-miR-26a-5p    | ↕ | PCGF1   | hsa-miR-502-3p    | ↕ | COL15A1 | hsa-miR-1976      | ↕ | NDST3    | hsa-miR-665       | ↕ | SLC6A19  |
| hsa-miR-101-3p    | ↕ | PCGF1   | hsa-miR-767-5p    | ↕ | COL15A1 | hsa-miR-148a-3p   | ↕ | AGBL4    | hsa-miR-1247-5p   | ↕ | SLC6A19  |
| hsa-miR-10a-5p    | ↕ | PCGF1   | hsa-miR-767-3p    | ↕ | COL15A1 | hsa-miR-30c-5p    | ↕ | AGBL4    | hsa-miR-3648      | ↕ | SLC6A19  |
| hsa-miR-142-5p    | ↕ | PCGF1   | hsa-miR-1254      | ↕ | COL15A1 | hsa-miR-30c-2-3p  | ↕ | AGBL4    | hsa-miR-3944-3p   | ↕ | SLC6A19  |
| hsa-miR-144-5p    | ↕ | PCGF1   | hsa-miR-10b-5p    | ↕ | TOMM40L | hsa-miR-203a-3p   | ↕ | AGBL4    | hsa-miR-151a-3p   | ↕ | LRRN1    |
| hsa-miR-193a-5p   | ↕ | PCGF1   | hsa-miR-188-5p    | ↕ | TOMM40L | hsa-miR-200b-5p   | ↕ | AGBL4    | hsa-miR-518b      | ↕ | LRRN1    |
| hsa-miR-200a-5p   | ↕ | PCGF1   | hsa-miR-532-5p    | ↕ | TOMM40L | hsa-miR-30e-3p    | ↕ | AGBL4    | hsa-miR-517-5p    | ↕ | LRRN1    |
| hsa-miR-30e-3p    | ↕ | PCGF1   | hsa-miR-1180-3p   | ↕ | TOMM40L | hsa-miR-505-3p    | ↕ | AGBL4    | hsa-miR-25-3p     | ↕ | ALDH1B1  |
| hsa-miR-379-5p    | ↕ | PCGF1   | hsa-miR-10b-5p    | ↕ | SPTAN1  | hsa-miR-802       | ↕ | AGBL4    | hsa-miR-132-3p    | ↕ | ALDH1B1  |
| hsa-miR-490-5p    | ↕ | PCGF1   | hsa-miR-34b-3p    | ↕ | SPTAN1  | hsa-miR-378c      | ↕ | AGBL4    | hsa-miR-99b-3p    | ↕ | ALDH1B1  |
| hsa-miR-505-5p    | ↕ | PCGF1   | hsa-miR-99b-3p    | ↕ | SPTAN1  | hsa-miR-3648      | ↕ | AGBL4    | hsa-miR-361-5p    | ↕ | ALDH1B1  |
| hsa-miR-592       | ↕ | PCGF1   | hsa-miR-151a-3p   | ↕ | SPTAN1  | hsa-miR-3687      | ↕ | AGBL4    | hsa-miR-330-5p    | ↕ | ALDH1B1  |
| hsa-miR-3944-3p   | ↕ | PCGF1   | hsa-miR-508-5p    | ↕ | SPTAN1  | hsa-miR-21-3p     | ↕ | CSRNP1   | hsa-miR-425-5p    | ↕ | ALDH1B1  |
| hsa-miR-19b-1-5p  | ↕ | COL15A1 | hsa-miR-589-5p    | ↕ | SPTAN1  | hsa-miR-139-3p    | ↕ | CSRNP1   | hsa-miR-767-5p    | ↕ | ALDH1B1  |
| hsa-miR-192-5p    | ↕ | COL15A1 | hsa-miR-891a-5p   | ↕ | SPTAN1  | hsa-miR-7-1-3p    | ↕ | CSRNP1   | hsa-miR-760       | ↕ | ALDH1B1  |
| hsa-miR-148a-3p   | ↕ | COL15A1 | hsa-miR-301b-3p   | ↕ | SPTAN1  | hsa-miR-223-3p    | ↕ | CSRNP1   | hsa-miR-1278      | ↕ | ALDH1B1  |
| hsa-miR-139-5p    | ↕ | COL15A1 | hsa-miR-3144-5p   | ↕ | SPTAN1  | hsa-miR-30b-5p    | ↕ | CSRNP1   | hsa-miR-3144-3p   | ↕ | ALDH1B1  |
| hsa-miR-187-3p    | ↕ | COL15A1 | hsa-miR-3174      | ↕ | SPTAN1  | hsa-miR-30e-3p    | ↕ | CSRNP1   | hsa-miR-3074-3p   | ↕ | ALDH1B1  |
| hsa-miR-210-3p    | ↕ | COL15A1 | hsa-miR-3677-3p   | ↕ | SPTAN1  | hsa-miR-424-5p    | ↕ | CSRNP1   | hsa-miR-3168      | ↕ | ALDH1B1  |
| hsa-miR-144-3p    | ↕ | COL15A1 | hsa-miR-3680-3p   | ↕ | SPTAN1  | hsa-miR-486-5p    | ↕ | CSRNP1   | hsa-miR-10b-5p    | ↕ | NDST3    |
| hsa-miR-30e-5p    | ↕ | COL15A1 | hsa-miR-10b-5p    | ↕ | HIGD1B  | hsa-miR-489-3p    | ↕ | CSRNP1   | hsa-miR-188-5p    | ↕ | NDST3    |
| hsa-miR-383-5p    | ↕ | COL15A1 | hsa-miR-132-3p    | ↕ | HIGD1B  | hsa-miR-490-5p    | ↕ | CSRNP1   | hsa-miR-362-3p    | ↕ | NDST3    |
| hsa-miR-486-5p    | ↕ | COL15A1 | hsa-miR-151a-3p   | ↕ | HIGD1B  | hsa-miR-450b-5p   | ↕ | CSRNP1   | hsa-miR-151a-3p   | ↕ | NDST3    |
| hsa-miR-511-5p    | ↕ | COL15A1 | hsa-miR-502-3p    | ↕ | HIGD1B  | hsa-miR-139-5p    | ↕ | ADAMTS13 | hsa-miR-581       | ↕ | NDST3    |
| hsa-miR-33b-5p    | ↕ | COL15A1 | hsa-miR-1276      | ↕ | HIGD1B  | hsa-miR-200b-3p   | ↕ | ADAMTS13 | hsa-miR-767-3p    | ↕ | NDST3    |
| hsa-miR-1468-5p   | ↕ | COL15A1 | hsa-miR-30c-5p    | ↕ | LRRN1   | hsa-miR-130a-3p   | ↕ | ADAMTS13 | hsa-miR-132-3p    | ↕ | AGBL4    |
| hsa-miR-675-3p    | ↕ | COL15A1 | hsa-miR-30c-2-3p  | ↕ | LRRN1   | hsa-miR-144-5p    | ↕ | ADAMTS13 | hsa-miR-34c-5p    | ↕ | AGBL4    |
| hsa-miR-378c      | ↕ | COL15A1 | hsa-miR-10a-5p    | ↕ | LRRN1   | hsa-miR-424-5p    | ↕ | ADAMTS13 | hsa-miR-589-5p    | ↕ | AGBL4    |
| hsa-miR-3614-3p   | ↕ | COL15A1 | hsa-miR-200b-3p   | ↕ | LRRN1   | hsa-miR-490-5p    | ↕ | ADAMTS13 | hsa-miR-550a-5p   | ↕ | AGBL4    |
| hsa-miR-3664-5p   | ↕ | COL15A1 | hsa-miR-490-3p    | ↕ | LRRN1   | hsa-miR-490-3p    | ↕ | ADAMTS13 | hsa-miR-548o-3p   | ↕ | AGBL4    |
| hsa-miR-101-3p    | ↕ | TOMM40L | hsa-miR-450b-5p   | ↕ | LRRN1   | hsa-miR-450b-5p   | ↕ | ADAMTS13 | hsa-miR-1278      | ↕ | AGBL4    |
| hsa-miR-30c-2-3p  | ↕ | TOMM40L | hsa-miR-1258      | ↕ | LRRN1   | hsa-miR-3648      | ↕ | ADAMTS13 | hsa-miR-7-2-3p    | ↕ | CSRNP1   |
| hsa-miR-139-5p    | ↕ | TOMM40L | hsa-miR-3648      | ↕ | LRRN1   | hsa-miR-31-3p     | ↕ | BMP10    | hsa-miR-10b-5p    | ↕ | CSRNP1   |
| hsa-miR-139-3p    | ↕ | TOMM40L | hsa-miR-676-5p    | ↕ | LRRN1   | hsa-miR-101-3p    | ↕ | BMP10    | hsa-miR-222-3p    | ↕ | CSRNP1   |
| hsa-miR-130a-3p   | ↕ | TOMM40L | hsa-miR-22-3p     | ↕ | ALDH1B1 | hsa-miR-139-3p    | ↕ | BMP10    | hsa-miR-188-5p    | ↕ | CSRNP1   |
| hsa-miR-450b-5p   | ↕ | TOMM40L | hsa-miR-23a-5p    | ↕ | ALDH1B1 | hsa-miR-142-5p    | ↕ | BMP10    | hsa-miR-99b-3p    | ↕ | CSRNP1   |
| hsa-miR-19b-1-5p  | ↕ | SPTAN1  | hsa-miR-24-1-5p   | ↕ | ALDH1B1 | hsa-miR-142-3p    | ↕ | BMP10    | hsa-miR-452-5p    | ↕ | CSRNP1   |
| hsa-miR-26b-3p    | ↕ | SPTAN1  | hsa-miR-187-3p    | ↕ | ALDH1B1 | hsa-miR-144-5p    | ↕ | BMP10    | hsa-miR-589-5p    | ↕ | CSRNP1   |
| hsa-miR-192-3p    | ↕ | SPTAN1  | hsa-let-7g-3p     | ↕ | ALDH1B1 | hsa-miR-193a-5p   | ↕ | BMP10    | hsa-miR-891a-5p   | ↕ | CSRNP1   |
| hsa-miR-210-3p    | ↕ | SPTAN1  | hsa-miR-122-5p    | ↕ | ALDH1B1 | hsa-miR-30e-5p    | ↕ | BMP10    | hsa-miR-934       | ↕ | CSRNP1   |
| hsa-miR-200b-3p   | ↕ | SPTAN1  | hsa-miR-122-3p    | ↕ | ALDH1B1 | hsa-miR-424-5p    | ↕ | BMP10    | hsa-miR-3677-3p   | ↕ | CSRNP1   |
| hsa-miR-30b-5p    | ↕ | SPTAN1  | hsa-miR-142-3p    | ↕ | ALDH1B1 | hsa-miR-663a      | ↕ | BMP10    | hsa-miR-10b-5p    | ↕ | ADAMTS13 |
| hsa-miR-29c-5p    | ↕ | SPTAN1  | hsa-miR-193a-5p   | ↕ | ALDH1B1 | hsa-miR-1468-5p   | ↕ | BMP10    | hsa-miR-188-5p    | ↕ | ADAMTS13 |
| hsa-miR-29c-3p    | ↕ | SPTAN1  | hsa-miR-194-3p    | ↕ | ALDH1B1 | hsa-miR-450b-5p   | ↕ | BMP10    | hsa-miR-330-5p    | ↕ | ADAMTS13 |
| hsa-miR-574-3p    | ↕ | SPTAN1  | hsa-miR-200a-5p   | ↕ | ALDH1B1 | hsa-miR-101-5p    | ↕ | AQP7     | hsa-miR-421       | ↕ | ADAMTS13 |
| hsa-miR-33b-5p    | ↕ | SPTAN1  | hsa-miR-455-3p    | ↕ | ALDH1B1 | hsa-miR-139-5p    | ↕ | AQP7     | hsa-miR-10b-5p    | ↕ | BMP10    |
| hsa-miR-1468-5p   | ↕ | SPTAN1  | hsa-miR-665       | ↕ | ALDH1B1 | hsa-miR-490-3p    | ↕ | AQP7     | hsa-miR-183-3p    | ↕ | BMP10    |
| hsa-miR-24-1-5p   | ↕ | HIGD1B  | hsa-miR-3614-3p   | ↕ | ALDH1B1 | hsa-let-7b-5p     | ↕ | SLC6A19  | hsa-miR-222-3p    | ↕ | BMP10    |
| hsa-miR-101-3p    | ↕ | HIGD1B  | hsa-miR-3664-5p   | ↕ | ALDH1B1 | hsa-let-7b-3p     | ↕ | SLC6A19  | hsa-miR-106b-3p   | ↕ | BMP10    |
| hsa-miR-200b-3p   | ↕ | HIGD1B  | hsa-miR-3944-3p   | ↕ | ALDH1B1 | hsa-miR-19b-1-5p  | ↕ | SLC6A19  | hsa-miR-34c-5p    | ↕ | BMP10    |
| hsa-miR-144-5p    | ↕ | HIGD1B  | hsa-miR-139-5p    | ↕ | NDST3   | hsa-miR-139-3p    | ↕ | SLC6A19  | hsa-miR-520a-3p   | ↕ | BMP10    |
| hsa-miR-30e-3p    | ↕ | HIGD1B  | hsa-miR-139-3p    | ↕ | NDST3   | hsa-miR-10a-5p    | ↕ | SLC6A19  | hsa-miR-767-3p    | ↕ | BMP10    |
| hsa-miR-490-5p    | ↕ | HIGD1B  | hsa-miR-142-3p    | ↕ | NDST3   | hsa-miR-145-5p    | ↕ | SLC6A19  | hsa-miR-765       | ↕ | BMP10    |
| hsa-miR-490-3p    | ↕ | HIGD1B  | hsa-miR-144-5p    | ↕ | NDST3   | hsa-miR-145-3p    | ↕ | SLC6A19  | hsa-miR-1180-3p   | ↕ | BMP10    |
| hsa-miR-511-5p    | ↕ | HIGD1B  | hsa-miR-194-3p    | ↕ | NDST3   | hsa-miR-200a-5p   | ↕ | SLC6A19  | hsa-miR-3616-3p   | ↕ | BMP10    |
| hsa-miR-450b-5p   | ↕ | HIGD1B  | hsa-miR-200a-5p   | ↕ | NDST3   | hsa-miR-30e-3p    | ↕ | SLC6A19  | hsa-miR-3168      | ↕ | AQP7     |
| hsa-miR-34a-5p    | ↕ | PCGF1   | hsa-miR-380-5p    | ↕ | NDST3   | hsa-miR-363-3p    | ↕ | SLC6A19  | hsa-miR-34a-5p    | ↕ | SLC6A19  |
| hsa-miR-9-5p      | ↕ | PCGF1   | hsa-miR-424-5p    | ↕ | NDST3   | hsa-miR-383-5p    | ↕ | SLC6A19  | hsa-miR-452-5p    | ↕ | SLC6A19  |
| hsa-miR-873-5p    | ↕ | PCGF1   | hsa-miR-424-3p    | ↕ | NDST3   | hsa-miR-424-5p    | ↕ | SLC6A19  | hsa-miR-517-5p    | ↕ | SLC6A19  |
| hsa-miR-1180-3p   | ↕ | PCGF1   | hsa-miR-490-5p    | ↕ | NDST3   | hsa-miR-483-3p    | ↕ | SLC6A19  | hsa-miR-502-3p    | ↕ | SLC6A19  |
| hsa-miR-1278      | ↕ | PCGF1   | hsa-miR-490-3p    | ↕ | NDST3   | hsa-miR-490-3p    | ↕ | SLC6A19  | hsa-miR-508-3p    | ↕ | SLC6A19  |
| hsa-miR-10b-5p    | ↕ | COL15A1 | hsa-miR-511-5p    | ↕ | NDST3   | hsa-miR-494-3p    | ↕ | SLC6A19  | hsa-miR-767-5p    | ↕ | SLC6A19  |
| hsa-miR-106b-3p   | ↕ | COL15A1 | hsa-miR-505-5p    | ↕ | NDST3   | hsa-miR-193b-5p   | ↕ | SLC6A19  | hsa-miR-1276      | ↕ | SLC6A19  |
| hsa-miR-99b-3p    | ↕ | COL15A1 | hsa-miR-1185-5p   | ↕ | NDST3   | hsa-miR-505-5p    | ↕ | SLC6A19  | hsa-miR-3144-5p   | ↕ | SLC6A19  |
| hsa-miR-330-5p    | ↕ | COL15A1 | hsa-miR-802       | ↕ | NDST3   | hsa-miR-582-3p    | ↕ | SLC6A19  | hsa-miR-3144-3p   | ↕ | SLC6A19  |
| hsa-miR-339-3p    | ↕ | COL15A1 | hsa-miR-450b-5p   | ↕ | NDST3   | hsa-miR-744-3p    | ↕ | SLC6A19  |                   |   |          |
